# Supplementary material for: ACAD10 and ACAD11 enable mammalian 4-hydroxy acid lipid catabolism
Source: PubMed Central journal article supplement — bioRxiv. 2024 Jan 9:2024.01.09.574893. Preprint. [Version 1] doi: 10.1101/2024.01.09.574893 (PMC10802472; doi:10.1101/2024.01.09.574893), 2024-01-09
Supplement: NIHPP2024.01.09.574893v1-supplement-1.pdf [file NIHPP2024.01.09.574893v1-supplement-1.pdf]

## **Supplementary Information**

Supplementary Table 1 – Plasmid information and primer sequences

Supplementary Table 2 – Fragmentation and retention time information for the identification and quantification of acyl-CoAs and 4-HAs by LC-MS

Supplementary Table 3 – Reagent and internal standard information

Supplementary Figure 1 – HADDOCK report of octanoyl-CoA docking to ACAD11 A\* structure
